# Supplementary material
Source: Springer Nature journal article supplement (https://www.springermedizin.de/resource/supplementary/12889_2009_2172_MOESM2_ESM.pdf/9484854)

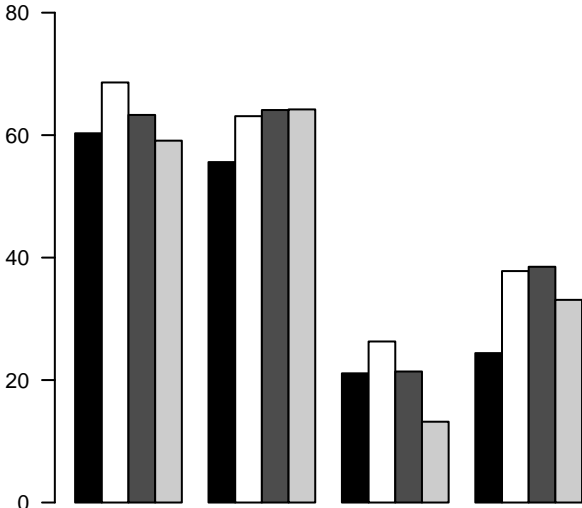

Est men

Fin men

Est women

Fin women

■ 25-34 □ 35-44 ■ 45-54 ■ 55-64

Supplement: MOESM2 [file 9484854]
